# Supplementary material
Source: PubMed Central journal article supplement (PMC4559213)
Supplement: i1552-5783-56-10-5751-s01.pdf [file i1552-5783-56-10-5751-s01.pdf]

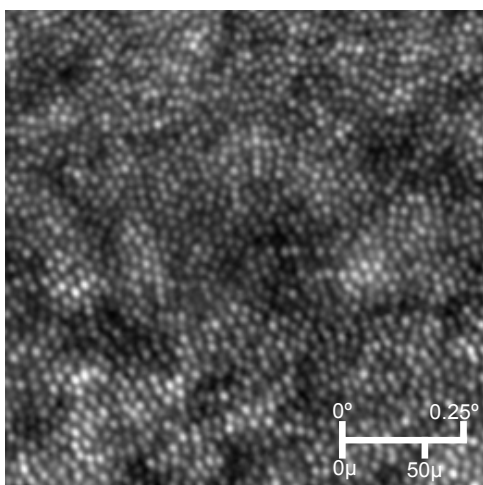

Subject A. Age:27

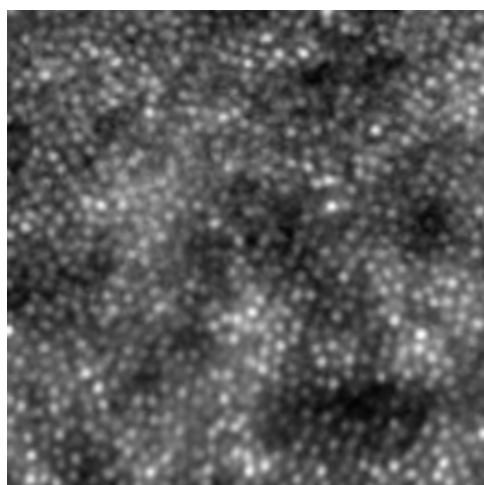

Subject B. Age:27

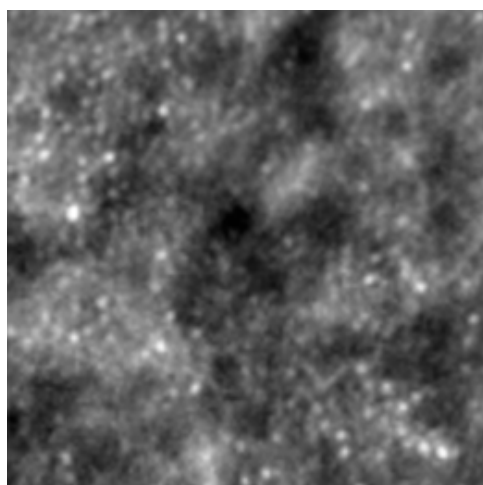

Subject C. Age:27

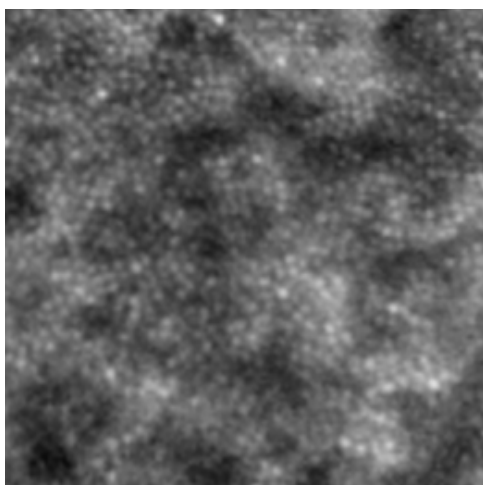

Subject D. Age:42

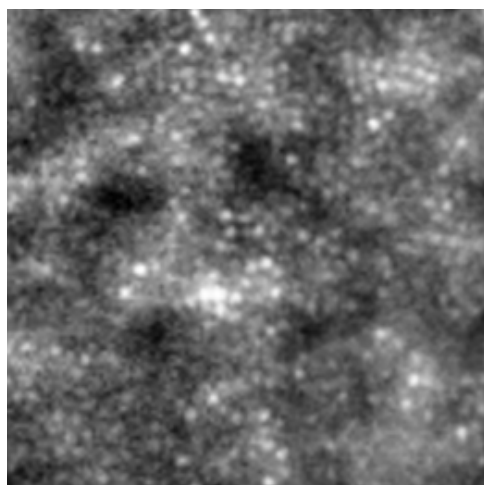

Subject E. Age:42

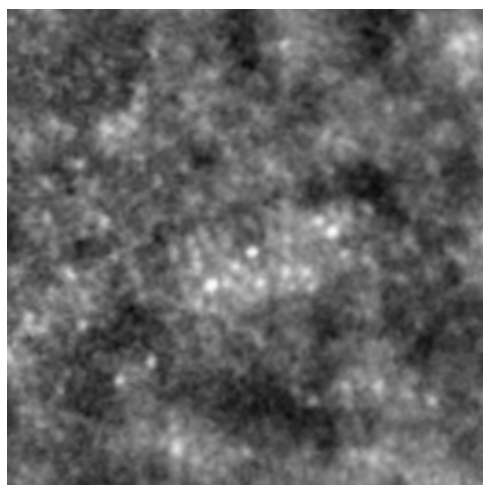

Subject F. Age:42

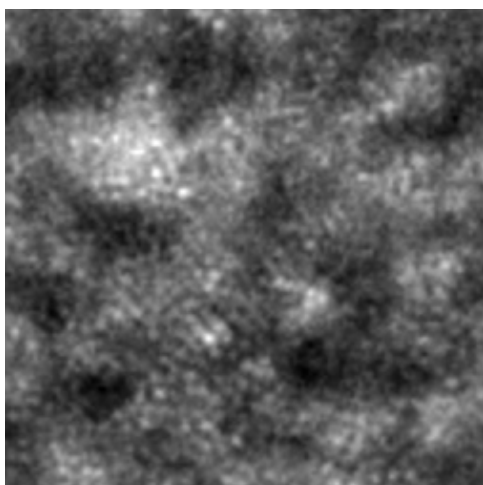

Subject G. Age:53

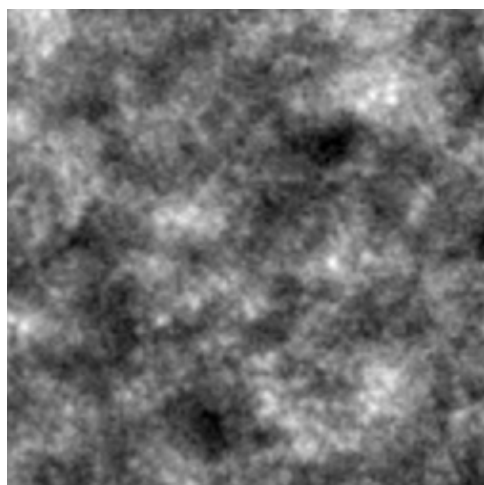

Subject H. Age:52

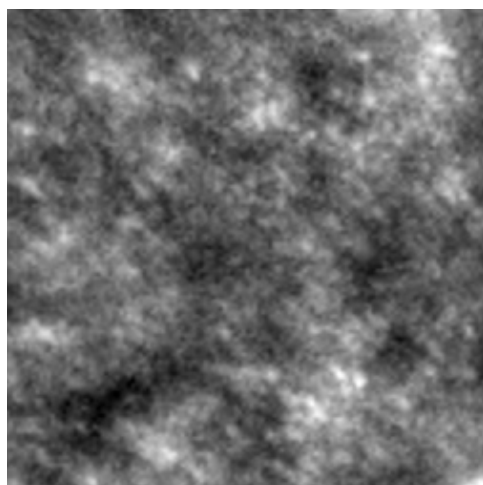

Subject I. Age:51

Supplemental Figure 1) Variation of image quality and cone density in younger and older subjects. The same perifoveal area is sampled in 9 different individuals. Image quality and cone density varies among individuals of the same age groups, decreasing in quality from left to right. In general image quality tends to be worse in older individuals.
