# Supplementary material
Source: PubMed Central journal article supplement (PMC4559213)
Supplement: i1552-5783-56-10-5751-s02.pdf [file i1552-5783-56-10-5751-s02.pdf]

Supplemental Table 1: Coefficient of Variation (CoV) of cone density measured in 3 different sampling methods in 9 subjects imaged on 3 separate occasions. Coefficient of variation is displayed in the parafoveal region (2.0°-2.5° eccentric from the foveal center) in A and perifoveal region (5.5°-6° eccentric from the foveal center) in B.

**A: Coefficient of variation of measurements of cone density in the region between 2.0° and 2.5°**

|                  | Meridian |          |          |          | Arcuate |          |          |          | Peak  |          |          |          |
|------------------|----------|----------|----------|----------|---------|----------|----------|----------|-------|----------|----------|----------|
|                  | nasal    | superior | temporal | inferior | nasal   | superior | temporal | inferior | nasal | superior | temporal | inferior |
| <b>Subject 1</b> | 4.93%    | 3.03%    | 1.98%    | 3.29%    | 4.16%   | 0.94%    | 3.29%    | 4.35%    | 5.60% | 2.80%    | 1.56%    | 5.76%    |
| <b>Subject 2</b> | 5.82%    | 15.75%   | 3.62%    | 5.52%    | 3.51%   | 5.26%    | 5.33%    | 1.45%    | 7.66% | 5.61%    | 10.51%   | 5.84%    |
| <b>Subject 3</b> | 9.85%    | 2.75%    | 10.24%   | 3.18%    | 3.98%   | 2.81%    | 1.33%    | 4.40%    | 5.68% | 2.39%    | 1.48%    | 3.54%    |
| <b>Subject 4</b> | 5.59%    | 6.55%    | 9.56%    | 4.94%    | 1.50%   | 1.01%    | 5.41%    | 2.94%    | 3.48% | 3.23%    | 6.97%    | 2.17%    |
| <b>Subject 5</b> | 5.06%    | 8.95%    | 9.15%    | 12.37%   | 4.16%   | 1.97%    | 1.91%    | 1.15%    | 6.52% | 2.04%    | 3.79%    | 1.64%    |
| <b>Subject 6</b> | 7.18%    | 9.04%    | 8.03%    | 0.32%    | 2.74%   | 3.52%    | 2.88%    | 2.87%    | 6.56% | 4.15%    | 1.56%    | 4.44%    |
| <b>Subject 7</b> | 11.32%   | 7.53%    | 13.86%   | 11.29%   | 6.14%   | 1.30%    | 2.17%    | 6.83%    | 8.49% | 1.96%    | 2.29%    | 9.36%    |
| <b>Subject 8</b> | 5.40%    | 4.03%    | 16.45%   | 12.08%   | 7.70%   | 4.49%    | 3.30%    | 3.61%    | 3.63% | 2.81%    | 1.79%    | 7.71%    |
| <b>Subject 9</b> | 24.66%   | 4.85%    | 9.86%    | 0.24%    | 2.73%   | 2.50%    | 12.26%   | 0.70%    | 4.29% | 1.98%    | 9.99%    | 1.64%    |

**B: Coefficient of variation of measurements of cone density in the region between 5.5° and 6.0°**

|                  | Meridian |          |          |          | Arcuate |          |          |          | Peak  |          |          |          |
|------------------|----------|----------|----------|----------|---------|----------|----------|----------|-------|----------|----------|----------|
|                  | nasal    | superior | temporal | inferior | nasal   | superior | temporal | inferior | nasal | superior | temporal | inferior |
| <b>Subject 1</b> | 3.96%    | 5.97%    | 3.88%    | 19.19%   | 0.64%   | 0.73%    | 0.55%    | 0.81%    | 1.92% | 3.70%    | 3.11%    | 1.73%    |
| <b>Subject 2</b> | 9.55%    | 8.12%    | 8.81%    | 25.87%   | 3.73%   | 1.54%    | 4.33%    | 0.72%    | 3.29% | 3.58%    | 3.99%    | 2.54%    |
| <b>Subject 3</b> | 6.70%    | 17.06%   | 22.13%   | 7.36%    | 2.30%   | 2.97%    | 4.22%    | 3.32%    | 4.52% | 4.36%    | 1.47%    | 6.82%    |
| <b>Subject 4</b> | 3.27%    | 15.53%   | 5.62%    | 10.81%   | 1.57%   | 1.49%    | 1.44%    | 1.60%    | 0.61% | 1.15%    | 0.11%    | 1.43%    |
| <b>Subject 5</b> | 0.97%    | 9.50%    | 5.24%    | 16.80%   | 0.68%   | 1.45%    | 0.89%    | 2.14%    | 3.74% | 2.62%    | 3.74%    | 4.29%    |
| <b>Subject 6</b> | 2.27%    | 3.48%    | 4.75%    | 14.21%   | 1.13%   | 1.34%    | 0.17%    | 1.22%    | 2.15% | 1.90%    | 3.20%    | 1.99%    |
| <b>Subject 7</b> | 4.15%    | 14.04%   | 6.33%    | 7.91%    | 4.12%   | 2.39%    | 1.33%    | 6.19%    | 2.89% | 6.55%    | 1.71%    | 10.82%   |
| <b>Subject 8</b> | 3.40%    | 7.22%    | 22.77%   | 20.48%   | 2.76%   | 1.70%    | 1.31%    | 1.61%    | 4.53% | 3.00%    | 2.65%    | 3.77%    |
| <b>Subject 9</b> | 6.41%    | 4.00%    | 7.79%    | 6.82%    | 1.10%   | 0.83%    | 0.58%    | 1.86%    | 0.70% | 4.58%    | 3.89%    | 4.94%    |

Supplemental Table 2: Repeatability coefficient of cone density measurements using each method of sampling as expressed in cone density and percent of average cone density. 95% of subjects will have differences between two independently obtained measurements no bigger in magnitude than the repeatability coefficient. Values are based on 3 separate measurements of 9 individuals between the ages of 19 and 59.

|                  | Meridian |          |          |          | Arcuate |          |          |          | Peak  |          |          |          |
|------------------|----------|----------|----------|----------|---------|----------|----------|----------|-------|----------|----------|----------|
|                  | nasal    | superior | temporal | inferior | nasal   | superior | temporal | inferior | nasal | superior | temporal | inferior |
| <b>2.0°-2.5°</b> | 5708     | 4557     | 5397     | 3713     | 2385    | 1610     | 2786     | 1856     | 4385  | 2338     | 4178     | 3450     |
| %                | 26%      | 21%      | 26%      | 18%      | 11%     | 8%       | 13%      | 10%      | 17%   | 9%       | 15%      | 13%      |
| <b>2.5°-3.0°</b> | 5329     | 4393     | 5283     | 5370     | 1882    | 850      | 1853     | 1335     | 3622  | 2140     | 3368     | 3441     |
| %                | 24%      | 22%      | 25%      | 29%      | 10%     | 5%       | 9%       | 8%       | 14%   | 9%       | 13%      | 15%      |
| <b>3.0°-3.5°</b> | 4673     | 3786     | 4636     | 3737     | 1377    | 589      | 1470     | 1066     | 2334  | 1134     | 2346     | 2895     |
| %                | 23%      | 21%      | 23%      | 24%      | 8%      | 4%       | 8%       | 7%       | 10%   | 5%       | 10%      | 14%      |
| <b>3.5°-4.0°</b> | 3336     | 3940     | 4149     | 2727     | 1117    | 702      | 928      | 871      | 2201  | 1531     | 1999     | 2829     |
| %                | 18%      | 23%      | 23%      | 18%      | 7%      | 4%       | 5%       | 6%       | 10%   | 8%       | 9%       | 15%      |
| <b>4.0°-4.5°</b> | 2748     | 4653     | 3694     | 4299     | 1107    | 656      | 771      | 880      | 2253  | 1867     | 1693     | 2421     |
| %                | 15%      | 29%      | 21%      | 30%      | 7%      | 4%       | 5%       | 6%       | 11%   | 10%      | 8%       | 13%      |
| <b>4.5°-5.0°</b> | 4219     | 4030     | 3342     | 3126     | 1015    | 712      | 948      | 1070     | 1918  | 2545     | 2361     | 2233     |
| %                | 24%      | 27%      | 20%      | 22%      | 6%      | 5%       | 6%       | 8%       | 10%   | 13%      | 12%      | 12%      |
| <b>5.0°-5.5°</b> | 2967     | 3947     | 3676     | 4902     | 803     | 493      | 796      | 990      | 1231  | 2064     | 1901     | 2566     |
| %                | 18%      | 25%      | 22%      | 35%      | 5%      | 3%       | 5%       | 7%       | 6%    | 11%      | 10%      | 14%      |
| <b>5.5°-6.0°</b> | 2213     | 4165     | 4686     | 5620     | 972     | 692      | 944      | 1107     | 1653  | 1944     | 1508     | 2818     |
| %                | 14%      | 29%      | 31%      | 41%      | 7%      | 5%       | 6%       | 8%       | 9%    | 11%      | 8%       | 16%      |
